# Supplementary material for: Chemical Pulping Advantages of Zip‐lignin Hybrid Poplar
Source: PubMed Central journal article supplement — ChemSusChem. 2017 Aug 24;10(18):3565–73. doi: 10.1002/cssc.201701317 (PMC5697620; doi:10.1002/cssc.201701317), 2017-08-24
Supplement: CSSC-10-3565-s001.pdf [file CSSC-10-3565-s001.pdf]

## Supporting Information

### **Chemical Pulping Advantages of Zip-lignin Hybrid Poplar**

Shengfei Zhou,<sup>[a]</sup> Troy Runge,<sup>\*[a]</sup> Steven D. Karlen,<sup>[b]</sup> John Ralph,<sup>[b]</sup> Eliana Gonzales-Vigil,<sup>[c]</sup>  
and Shawn D. Mansfield<sup>[c]</sup>

cssc\_201701317\_sm\_miscellaneous\_information.pdf

## Tables

**Table S1.** Bleaching conditions.

| Stage | Conditions                                                                                                                                  |
|-------|---------------------------------------------------------------------------------------------------------------------------------------------|
| O     | Pressurized with O <sub>2</sub> to 80 psig, 10% csc, 100 °C, 2.5% NaOH, 60 min.                                                             |
| D     | 0.20 Kappa factor, 3.5% csc, 50 °C, 45 min., initial pH adjusted to 4.0 with 10% H <sub>2</sub> SO <sub>4</sub>                             |
| EP    | 0.5% H <sub>2</sub> O <sub>2</sub> , 10% csc, 70 °C, 60 min., 2.5% NaOH, terminal pH ~ 11.0                                                 |
| D     | Varying % ClO <sub>2</sub> , 10% csc, 75 °C, 120 min., initial pH measured at 8.4 but not adjusted to achieve final pH of approximately 4.5 |

**Table S2.** Handsheet physical properties. Average values with standard deviation from n=4 in parentheses.

| PFI mill (rev) | CS Freeness (mL) |          | Specific volume (cm <sup>3</sup> /g) |             | Tensile Index (N-m/g) |            |
|----------------|------------------|----------|--------------------------------------|-------------|-----------------------|------------|
|                | L7               | WT       | L7                                   | WT          | L7                    | WT         |
| 100            | 555 (12)         | 563 (10) | 2.11 (0.14)                          | 2.09 (0.12) | 22.1 (1.4)            | 21.7 (1.3) |
| 500            | 501 (15)         | 521 (11) | 1.96 (0.14)                          | 1.95 (0.15) | 32.3 (0.9)            | 32.1 (1.1) |
| 1000           | 491 (11)         | 487 (12) | 1.87 (0.11)                          | 1.85 (0.11) | 38.8 (1.2)            | 39.5 (1.4) |
| 2000           | 438 (15)         | 445 (17) | 1.80 (0.13)                          | 1.78 (0.14) | 48.8 (1.3)            | 49.1 (1.5) |

\* Number in brackets is standard deviation.

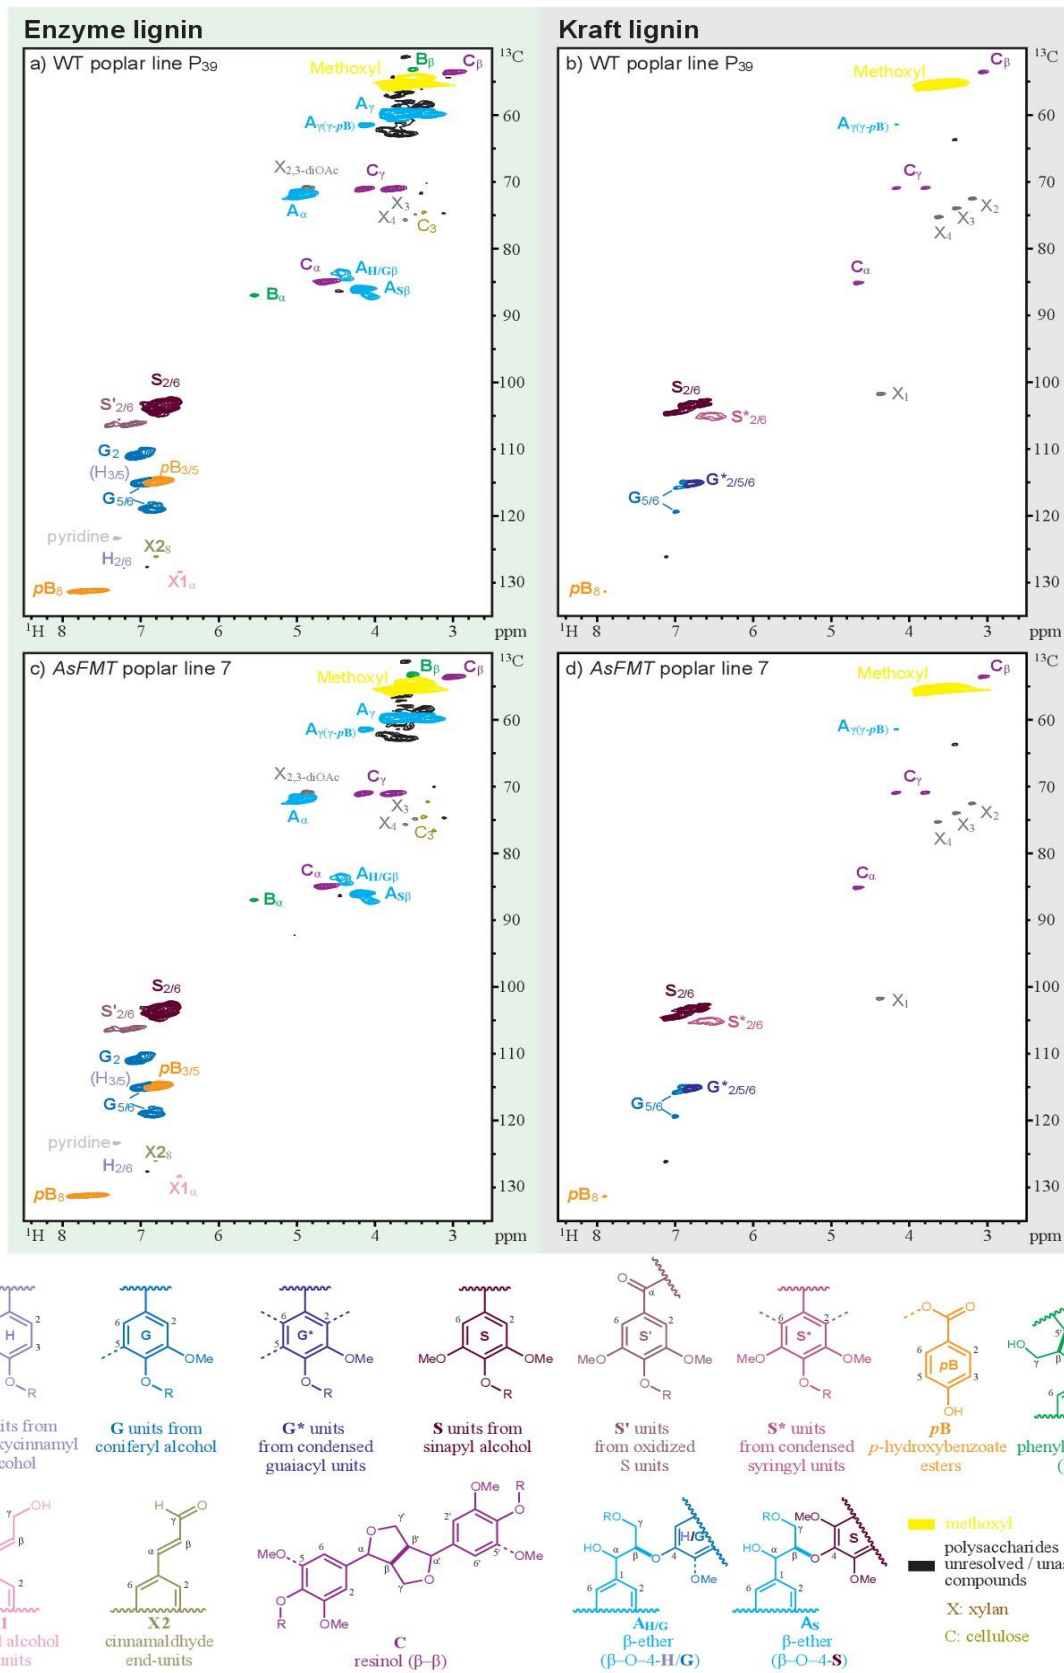

**Figure S1.** 2D  $^1\text{H}$ - $^{13}\text{C}$  HSQC NMR spectra of lignins from wild-type (WT) and Zip-lignin (line 7) poplar isolated before (enzyme lignin) and after (kraft lignin) kraft cooking (Contours are labeled and color coded to match the lignin substructures at the bottom of the figure).

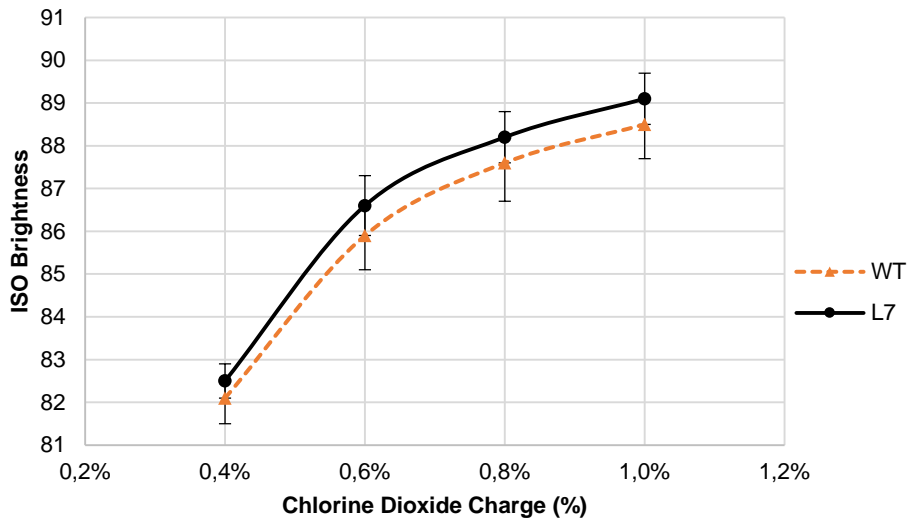

**Figure S2.** Brightness of the pulps as a function of final chlorine dioxide charge.
